# Supplementary material
Source: PubMed Central journal article supplement (PMC4288868)
Supplement: IAI.02500-14_zii999091017so1.pdf [file IAI.02500-14_zii999091017so1.pdf]

1 **Online supplement**

2

3 Macrophage-inducible C-type lectin Mincle expressing dendritic cells contribute to  
4 control splenic *Mycobacterium bovis* BCG infection in mice

5

6 Friederike Behler, Regina Maus, Jennifer Bohling, Sarah Knippenberg, Gabriele  
7 Kirchhof, Masahiro Nagata, Danny Jonigk, Nicole Izykowski, Lavinia Mägel, Tobias  
8 Welte, Sho Yamasaki, Ulrich A. Maus

9

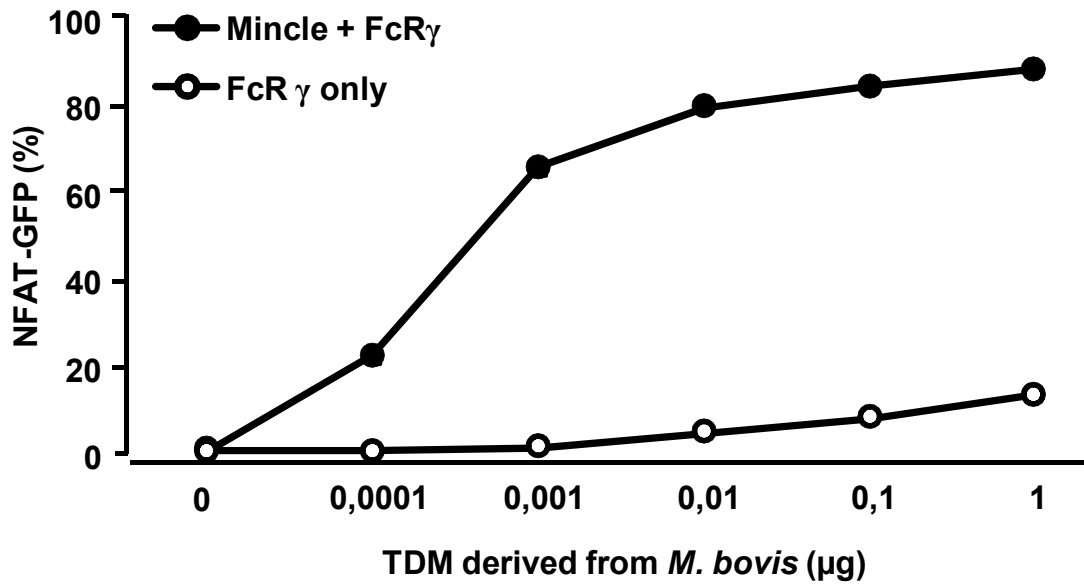

10

11

12 **Figure S1:** *M. bovis* derived TDM is a ligand for Mincle. NFAT-GFP reporter cells  
 13 expressing FcR $\gamma$  only (FcR $\gamma$ ), or Mincle + FcR $\gamma$  were stimulated with the indicated  
 14 amounts of plate-coated TDM derived from *M. bovis* for 18 h. Subsequently, cells  
 15 were washed off the plates and induction of NFAT-GFP (1) was analyzed by flow  
 16 cytometry. Data are shown as mean values of triplicate determinations, and the  
 17 experiment was repeated two times with similar results.

18

19

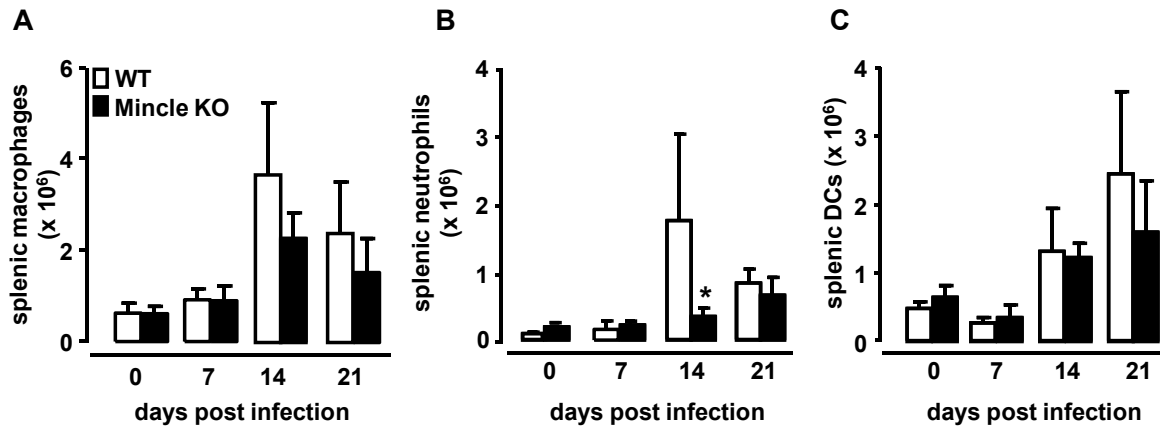

20  
21

22 **Figure S2:** Quantification of splenic macrophages, neutrophils, and DC after  
 23 intravenous *M. bovis* BCG infection of WT and Mincle KO mice. WT and Mincle KO  
 24 mice were intravenously infected with *M. bovis* BCG ( $8 \times 10^5$  CFU/mouse) and at  
 25 indicated time points, numbers of splenic phagocytes were determined. Values are  
 26 shown as mean  $\pm$  SD of  $n = 3-5$  mice per time point and treatment group. \*  $p < 0.05$   
 27 (Mann-Whitney U test).

28

29

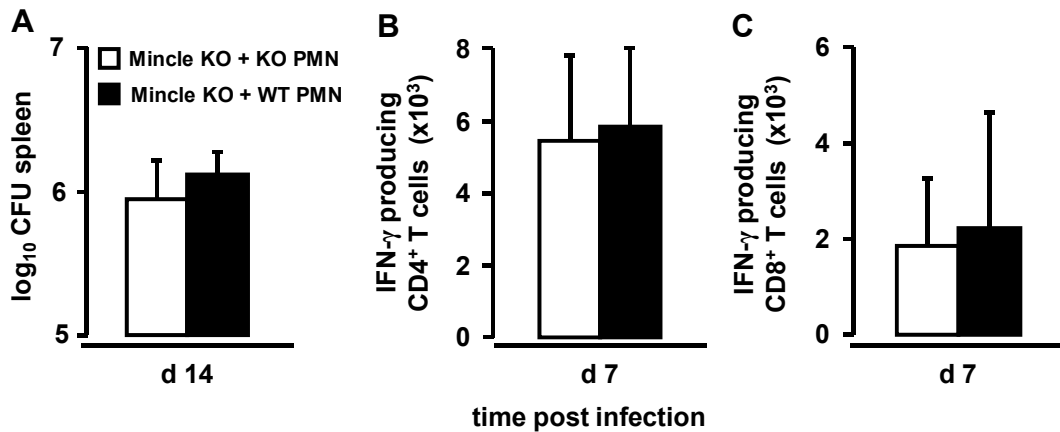

30

31

32 **Figure S3:** Effect of adoptive transfer of bone marrow neutrophils on splenic  
 33 antimycobacterial immunity in *M. bovis* BCG infected Mincle KO mice. Mincle KO  
 34 mice were intravenously infected with *M. bovis* BCG ( $8 \times 10^5$  CFU/mouse) and on day  
 35 0, 3, and 5 of infection, mice received bone marrow-derived WT or Mincle KO  
 36 neutrophils ( $5 \times 10^6$  cells/mouse i.v.). **(A)** On day 14 post infection, mycobacterial  
 37 loads were determined in the spleens of Mincle KO mice transfused with either  
 38 Mincle KO neutrophils (white bars), or WT neutrophils (black bars). **(B, C)** On day 7  
 39 post infection, splenic IFN- $\gamma$  producing CD4<sup>+</sup> T cells and CD8<sup>+</sup> T cells were  
 40 determined, as indicated. Values are shown as mean  $\pm$  SD of n = 3-6 mice per time  
 41 point and treatment group. The data are representative of at least two independently  
 42 performed experiments.

43

44

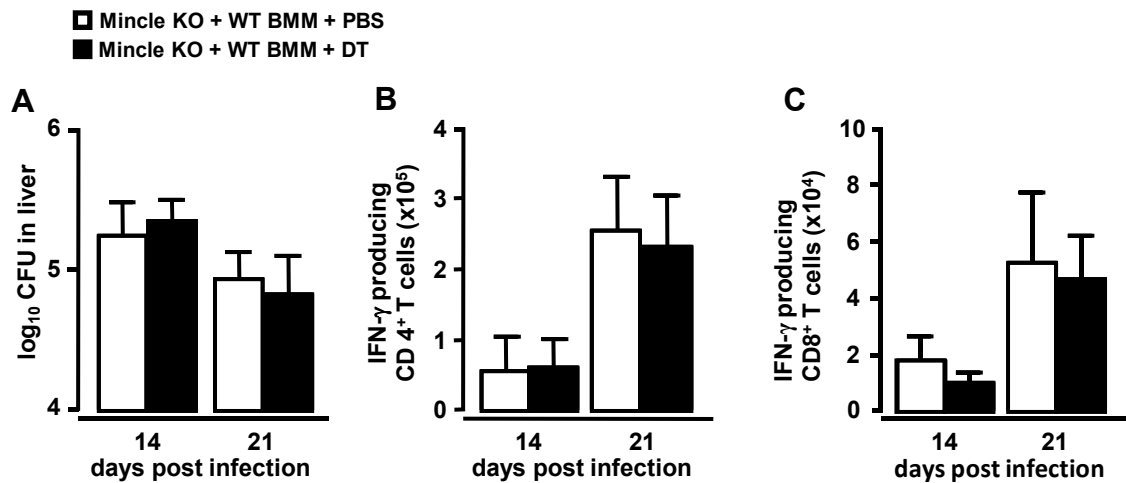

45

46

47 **Figure S4:** Effect of adoptive transfer of WT bone marrow-derived monocytes on  
 48 hepatic antimycobacterial immunity in Mincle KO mice. Mincle KO mice were infected  
 49 intravenously with *M. bovis* BCG ( $8 \times 10^5$  CFU/mouse) followed by adoptive transfer of  
 50 bone marrow-derived monocytes ( $5 \times 10^6$  cells/mouse) derived from transgenic  
 51  $zDC^{+/DTR}$  donor mice. Subsequently, mice were either treated i.p. with PBS or  
 52 diphtheria toxin, and on day 14 and 21 post infection, hepatic mycobacterial CFU (**A**),  
 53 or numbers of IFN- $\gamma$  producing CD4<sup>+</sup> T cells (**B**) or CD8<sup>+</sup> T cells (**C**) were determined.  
 54 The data are shown as mean  $\pm$  SD of  $n = 3-6$  mice per time point and treatment  
 55 group. The experiment was repeated two times with similar results.

56

57 **References**

- 58 1. **Miyake Y, Toyonaga K, Mori D, Kakuta S, Hoshino Y, Oyamada A, Yamada**  
59 **H, Ono K, Suyama M, Iwakura Y, Yoshikai Y, Yamasaki S.** 2013. C-type  
60 lectin MCL is an FcR $\gamma$ -coupled receptor that mediates the adjuvanticity of  
61 mycobacterial cord factor. *Immunity* **38**:1050-1062.

62
